# Supplementary material
Source: PubMed Central journal article supplement (PMC4250326)
Supplement: NIHMS612654-supplement-02.pdf [file NIHMS612654-supplement-02.pdf]

Supplementary Table 1

| Gene Symbol  | Gene Name                    | Fold Change | p-value (<0.05) |
|--------------|------------------------------|-------------|-----------------|
| <b>Tacr1</b> | <b>Tachykinin receptor 1</b> | <b>2.67</b> | <b>0.042</b>    |
| <b>Edn1</b>  | <b>Endothelin 1</b>          | <b>1.58</b> | <b>0.013</b>    |

| Gene Symbol    | Gene Name                                                          | Fold Change | p-value (> 0.05) |
|----------------|--------------------------------------------------------------------|-------------|------------------|
| <b>Il10</b>    | Interleukin 10                                                     | 2.23        | 0.369            |
| <b>Dbh</b>     | Dopamine beta hydroxylase                                          | 2.12        | 0.376            |
| <b>Cd4</b>     | CD4 antigen                                                        | 2.03        | 0.310            |
| <b>Bdkrb1</b>  | Bradykinin receptor, beta 1                                        | 1.98        | 0.389            |
| <b>Il2</b>     | Interleukin 2                                                      | 1.91        | 0.482            |
| <b>Il1a</b>    | Interleukin 1 alpha                                                | 1.84        | 0.379            |
| <b>Prok2</b>   | Prokineticin 2                                                     | 1.81        | 0.261            |
| <b>Grm1</b>    | Glutamate receptor, metabotropic 1                                 | 1.79        | 0.443            |
| <b>Tnf</b>     | Tumor necrosis factor                                              | 1.59        | 0.304            |
| <b>Adrb2</b>   | Adrenergic receptor, beta 2                                        | 1.50        | 0.247            |
| <b>Pla2g1b</b> | Phospholipase A2, group IB, pancreas                               | 1.49        | 0.564            |
| <b>Il6</b>     | Interleukin 6                                                      | 1.46        | 0.483            |
| <b>Oprd1</b>   | Opioid receptor, delta 1                                           | 1.32        | 0.338            |
| <b>Il1b</b>    | Interleukin 1 beta                                                 | 1.27        | 0.667            |
| <b>Faah</b>    | Fatty acid amide hydrolase                                         | 1.27        | 0.167            |
| <b>Cnr1</b>    | Cannabinoid receptor 1 (brain)                                     | 1.23        | 0.425            |
| <b>Bdnf</b>    | Brain derived neurotrophic factor                                  | 1.20        | 0.786            |
| <b>Ptger1</b>  | Prostaglandin E receptor 1 (subtype EP1)                           | 1.20        | 0.258            |
| <b>Mapk8</b>   | Mitogen-activated protein kinase 8                                 | 1.19        | 0.530            |
| <b>Pdyn</b>    | Prodynorphin                                                       | 1.18        | 0.809            |
| <b>Cd200</b>   | Cd200 antigen                                                      | 1.15        | 0.515            |
| <b>Tac1</b>    | Tachykinin 1                                                       | 1.12        | 0.877            |
| <b>Ccl12</b>   | Chemokine (C-C motif) ligand 12                                    | 1.12        | 0.772            |
| <b>P2rx7</b>   | Purinergic receptor P2X, ligand-gated ion channel, 7               | 1.11        | 0.341            |
| <b>Scn3a</b>   | Sodium channel, voltage-gated, type III, alpha                     | 1.11        | 0.780            |
| <b>Trpv3</b>   | Transient receptor potential cation channel, subfamily V, member 3 | 1.10        | 0.608            |
| <b>Cx3cr1</b>  | Chemokine (C-X3-C) receptor 1                                      | 1.09        | 0.609            |
| <b>Alox5</b>   | Arachidonate 5-lipoxygenase                                        | 1.08        | 0.299            |
| <b>Adora1</b>  | Adenosine A1 receptor                                              | 1.08        | 0.538            |
| <b>Grin2b</b>  | Glutamate receptor, ionotropic, NMDA2B (epsilon 2)                 | 1.08        | 0.603            |
| <b>Gch1</b>    | GTP cyclohydrolase 1                                               | 1.08        | 0.202            |
| <b>Scn9a</b>   | Sodium channel, voltage-gated, type IX, alpha                      | 1.08        | 0.908            |
| <b>Kcnj6</b>   | Potassium inwardly-rectifying channel, subfamily J, member 6       | 1.07        | 0.894            |
| <b>Il18</b>    | Interleukin 18                                                     | 1.07        | 0.874            |
| <b>Mapk3</b>   | Mitogen-activated protein kinase 3                                 | 1.07        | 0.581            |
| <b>Mapk1</b>   | Mitogen-activated protein kinase 1                                 | 1.05        | 0.768            |
| <b>Grin1</b>   | Glutamate receptor, ionotropic, NMDA1 (zeta 1)                     | 1.05        | 0.586            |
| <b>Gdnf</b>    | Glial cell line derived neurotrophic factor                        | 1.05        | 0.660            |
| <b>Ptger4</b>  | Prostaglandin E receptor 4 (subtype EP4)                           | 1.04        | 0.478            |
| <b>Grm5</b>    | Glutamate receptor, metabotropic 5                                 | 1.04        | 0.561            |
| <b>Ptger3</b>  | Prostaglandin E receptor 3 (subtype EP3)                           | 1.03        | 0.603            |
| <b>Itgb2</b>   | Integrin beta 2                                                    | 1.02        | 0.725            |
| <b>Oprm1</b>   | Opioid receptor, mu 1                                              | 1.01        | 0.896            |
| <b>Ngf</b>     | Nerve growth factor                                                | 1.01        | 0.844            |
| <b>Ptgs2</b>   | Prostaglandin-endoperoxide synthase 2                              | 1.00        | 0.503            |

| <b>Gene Symbol</b> | <b>Gene Name</b>                                                               | <b>Fold Change</b> | <b>p-value (&lt;0.05)</b> |
|--------------------|--------------------------------------------------------------------------------|--------------------|---------------------------|
| <b>Calca</b>       | Calcitonin/calcitonin-related polypeptide, alpha                               | 0.99               | 0.908                     |
| <b>Ace</b>         | Angiotensin I converting enzyme (peptidyl-dipeptidase A) 1                     | 0.99               | 0.653                     |
| <b>Kcnip3</b>      | Kv channel interacting protein 3, calsenilin                                   | 0.99               | 0.953                     |
| <b>Tlr4</b>        | Toll-like receptor 4                                                           | 0.99               | 0.751                     |
| <b>P2ry1</b>       | Purinergic receptor P2Y, G-protein coupled 1                                   | 0.99               | 0.968                     |
| <b>Maob</b>        | Monoamine oxidase B                                                            | 0.98               | 0.935                     |
| <b>Kcnq2</b>       | Potassium voltage-gated channel, subfamily Q, member 2                         | 0.97               | 0.838                     |
| <b>Ccr2</b>        | Chemokine (C-C motif) receptor 2                                               | 0.97               | 0.632                     |
| <b>Pnoc</b>        | Prepronociceptin                                                               | 0.96               | 0.801                     |
| <b>Comt</b>        | Catechol-O-methyltransferase                                                   | 0.96               | 0.874                     |
| <b>Cck</b>         | Cholecystokinin                                                                | 0.96               | 0.451                     |
| <b>Kcnq3</b>       | Potassium voltage-gated channel, subfamily Q, member 3                         | 0.94               | 0.590                     |
| <b>Scn10a</b>      | Sodium channel, voltage-gated, type X, alpha                                   | 0.94               | 0.632                     |
| <b>Mapk14</b>      | Mitogen-activated protein kinase 14                                            | 0.94               | 0.427                     |
| <b>P2rx4</b>       | Purinergic receptor P2X, ligand-gated ion channel 4                            | 0.92               | 0.372                     |
| <b>Ptgs1</b>       | Prostaglandin-endoperoxide synthase 1                                          | 0.91               | 0.843                     |
| <b>Ptges2</b>      | Prostaglandin E synthase 2                                                     | 0.91               | 0.705                     |
| <b>Chrna4</b>      | Cholinergic receptor, nicotinic, alpha polypeptide 4                           | 0.90               | 0.932                     |
| <b>Cacna1b</b>     | Calcium channel, voltage-dependent, N type, alpha 1B subunit                   | 0.90               | 0.590                     |
| <b>Scn11a</b>      | Sodium channel, voltage-gated, type XI, alpha                                  | 0.89               | 0.598                     |
| <b>Trpa1</b>       | Transient receptor potential cation channel, subfamily A, member 1             | 0.88               | 0.610                     |
| <b>Cnr2</b>        | Cannabinoid receptor 2 (macrophage)                                            | 0.88               | 0.471                     |
| <b>Htr1a</b>       | 5-hydroxytryptamine (serotonin) receptor 1A                                    | 0.88               | 0.847                     |
| <b>Penk</b>        | Preproenkephalin                                                               | 0.87               | 0.413                     |
| <b>Ptges3</b>      | Prostaglandin E synthase 3 (cytosolic)                                         | 0.85               | 0.810                     |
| <b>P2rx3</b>       | Purinergic receptor P2X, ligand-gated ion channel, 3                           | 0.83               | 0.499                     |
| <b>Slc6a2</b>      | Solute carrier family 6 (neurotransmitter transporter, noradrenalin), member 2 | 0.83               | 0.968                     |
| <b>Oprk1</b>       | Opioid receptor, kappa 1                                                       | 0.82               | 0.615                     |
| <b>Csf1</b>        | Colony stimulating factor 1 (macrophage)                                       | 0.82               | 0.187                     |
| <b>Trpv1</b>       | Transient receptor potential cation channel, subfamily V, member 1             | 0.81               | 0.483                     |
| <b>Htr2a</b>       | 5-hydroxytryptamine (serotonin) receptor 2A                                    | 0.81               | 0.572                     |
| <b>Ntrk1</b>       | Neurotrophic tyrosine kinase, receptor, type 1                                 | 0.78               | 0.631                     |
| <b>Itgam</b>       | Integrin alpha M                                                               | 0.70               | 0.306                     |
| <b>Ednra</b>       | Endothelin receptor type A                                                     | 0.70               | 0.203                     |
| <b>Tlr2</b>        | Toll-like receptor 2                                                           | 0.67               | 0.146                     |
| <b>Ptges</b>       | Prostaglandin E synthase                                                       | 0.66               | 0.338                     |
| <b>Cckbr</b>       | Cholecystokinin B receptor                                                     | 0.60               | 0.884                     |
